# Supplementary material for: NHLRC2 expression is increased in idiopathic pulmonary fibrosis
Source: PubMed Central journal article supplement (PMC9375339; doi:10.1186/s12931-022-02129-z), 2022-08-13
Supplement: 12931_2022_2129_MOESM1_ESM.pdf [file 12931_2022_2129_MOESM1_ESM.pdf]

**Table S1. Antibodies used for immunohistochemistry and Western blot analysis.**

| Antibody                                                           | Supplier and catalogue number                | Epitope retrieval in IHC                 | Dilution |                  | Incubation                                     |
|--------------------------------------------------------------------|----------------------------------------------|------------------------------------------|----------|------------------|------------------------------------------------|
|                                                                    |                                              |                                          | IHC      | WB               |                                                |
| <b>Primary antibody</b>                                            |                                              |                                          |          |                  |                                                |
| Polyclonal rabbit anti-NHLRC2                                      | Sigma-Aldrich, HPA038493                     | MW in Tris-EDTA buffer (pH 9) for 15 min | 1:500    | 1:500 in TBS-T   | 30 min at RT and o/n +4°C (IHC), o/n +4°C (WB) |
| Polyclonal rabbit anti-collagen IV alpha 1                         | Novus Biologicals (Abingdon, UK), NB120-6586 | Pepsin treatment for 30 min at 37°C      | 1:75     | -                | 1h at RT                                       |
| Monoclonal mouse smooth muscle actin (clone 1A4)                   | Dako (Glostrup, Denmark), M0851              | MW in Tris-EDTA buffer (pH 9) for 15 min | 1:1,000  | 1:1,000 in TBS-T | 30 min at RT (IHC), o/n at +4°C (WB)           |
| Monoclonal mouse anti-human CD68 (clone PG-M1)                     | Dako, M0876                                  | MW in Tris-EDTA buffer (pH 9) for 15 min | 1:300    | -                | 30 min at RT                                   |
| Monoclonal mouse anti-thyroid transcription factor (clone 8G7G3/1) | Dako, M3575                                  | MW in Tris-EDTA buffer (pH 9) for 15 min | 1:200    | -                | 30 min at RT                                   |
| Monoclonal mouse anti-human CD31 (clone JC70A)                     | Dako, M0823                                  | MW in Tris-EDTA buffer (pH 9) for 15 min | 1:100    | -                | 30 min at RT                                   |

|                                               |                                     |   |   |                     |             |
|-----------------------------------------------|-------------------------------------|---|---|---------------------|-------------|
| Rabbit polyclonal<br>anti-GAPDH               | Abcam<br>(Cambridge, UK),<br>ab9485 | - | - | 1:2,500 in<br>TBS-T | o/n at +4°C |
| Mouse monoclonal<br>anti-GAPDH (clone<br>C65) | Abcam, ab8245                       | - | - | 1:5,000 in<br>TBS-T | o/n at +4°C |

---

**Secondary  
antibody**

---

|                                  |                                                                     |   |   |                      |          |
|----------------------------------|---------------------------------------------------------------------|---|---|----------------------|----------|
|                                  | LI-COR                                                              |   |   |                      |          |
| Donkey anti-mouse<br>IRDye680RD  | Biosciences<br>(Lincoln, NE,<br>USA), 925-68072                     | - | - | 1:10,000 in<br>TBS-T | 1h at RT |
| Donkey anti-mouse<br>IRDye800CW  | LI-COR, 926-<br>32212                                               | - | - | 1:10,000 in<br>TBS-T | 1h at RT |
| Donkey anti-rabbit<br>IRDye800CW | LI-COR, 925-<br>32213                                               | - | - | 1:10,000 in<br>TBS-T | 1h at RT |
| Donkey anti-rabbit<br>IRDye700DX | Rockland<br>Immunochemicals<br>(Pottstown, PA,<br>USA), 611-730-127 | - | - | 1:5,000 in<br>TBS-T  | 1h at RT |

---

IHC, immunohistochemistry; MW, microwave heat treatment; o/n, overnight; RT, room temperature;  
TBS-T, tris-buffered saline supplemented with 0.1% tween-20; WB, Western blot analysis.

**Table S2. Sequences, annealing temperatures, and amplicon sizes of primers used for RT-qPCR.**

| Target        | Primer  | Sequence 5'-3'           | Ta (°C) | Amplicon size (bp) |
|---------------|---------|--------------------------|---------|--------------------|
| <i>ACTA2</i>  | Forward | GCAGCCCAGCCAAGCACTGT     | 63      | 135                |
|               | Reverse | TGGGAGCATCGTCCCCAGCA     |         |                    |
| <i>COL4A1</i> | Forward | CCCCAAAGGTGTTGACGGCT     | 61.4    | 126                |
|               | Reverse | AGACCAACTCCAGGCTCTCC     |         |                    |
| <i>GAPDH</i>  | Forward | GAGTCAACGGATTTGGTCGT     | 63      | 185                |
|               | Reverse | GACAAGCTTCCCGTTCTCAG     |         |                    |
| <i>NHLRC2</i> | Forward | AGCTGAAGGCAATGAATGGCTACT | 59      | 173                |
|               | Reverse | TACAAGCACTGCTGTCTGCACTA  |         |                    |
